# Supplementary material
Source: Springer Nature journal article supplement (https://www.springermedizin.de/resource/supplementary/12967_2012_1188_MOESM2_ESM.pdf/9573280)

**A**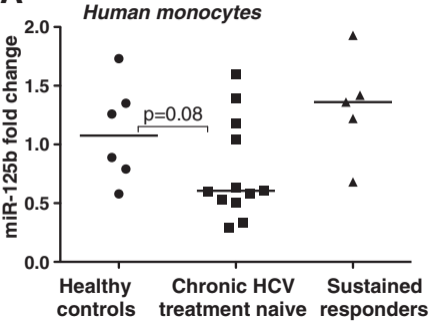**B**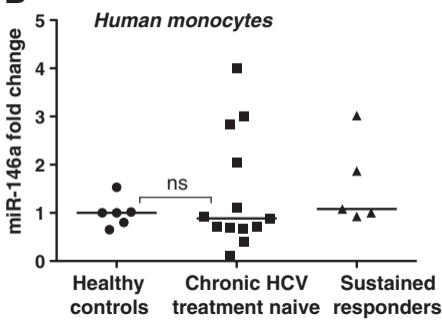

Supplement: MOESM2 [file 9573280]
